# Supplementary material
Source: Springer Nature journal article supplement (https://www.springermedizin.de/resource/supplementary/13023_2011_369_MOESM4_ESM.pdf/9642204)

# EXON 4

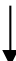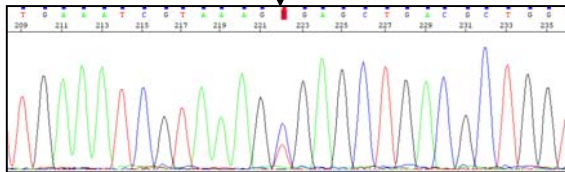

P12 (lymphocytes)

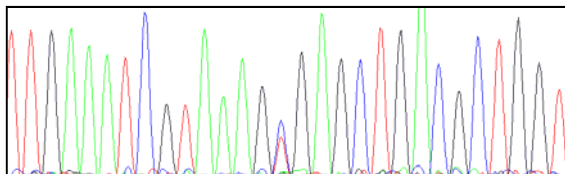

P12 (cheek swab)

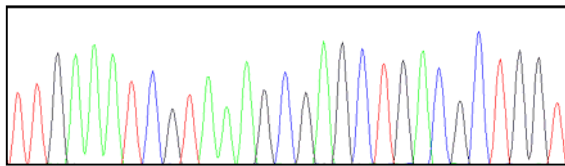

Mother

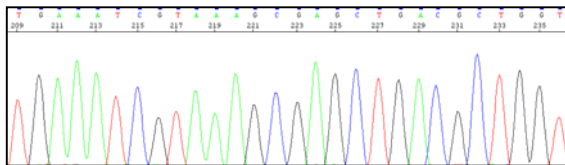

Father

Supplement: MOESM4 [file 9642204]
